# Supplementary material
Source: Springer Nature journal article supplement (https://www.springermedizin.de/resource/supplementary/12885_2011_2763_MOESM5_ESM.pdf/9461904)

**A****ZBTB20****AFP**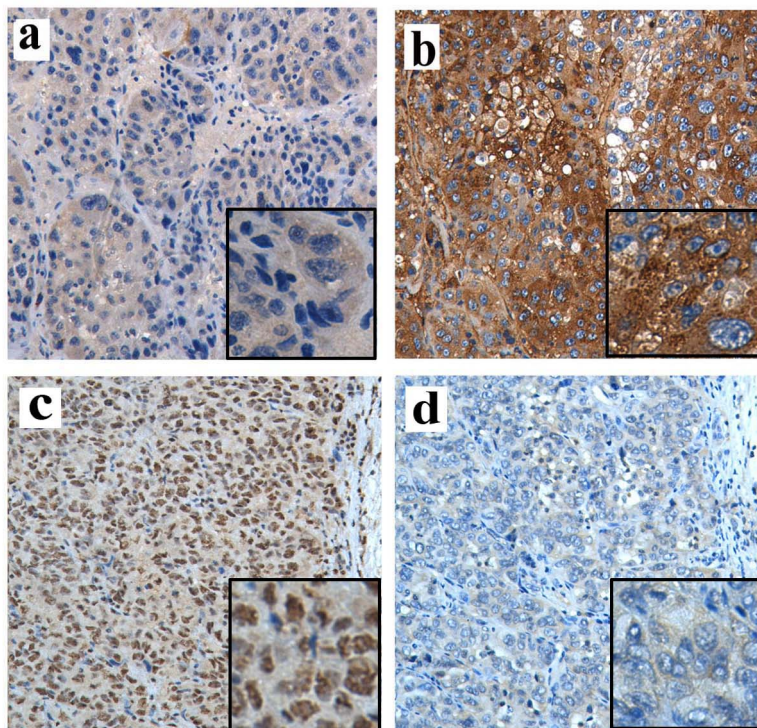**Case 27756****Case 26786****B**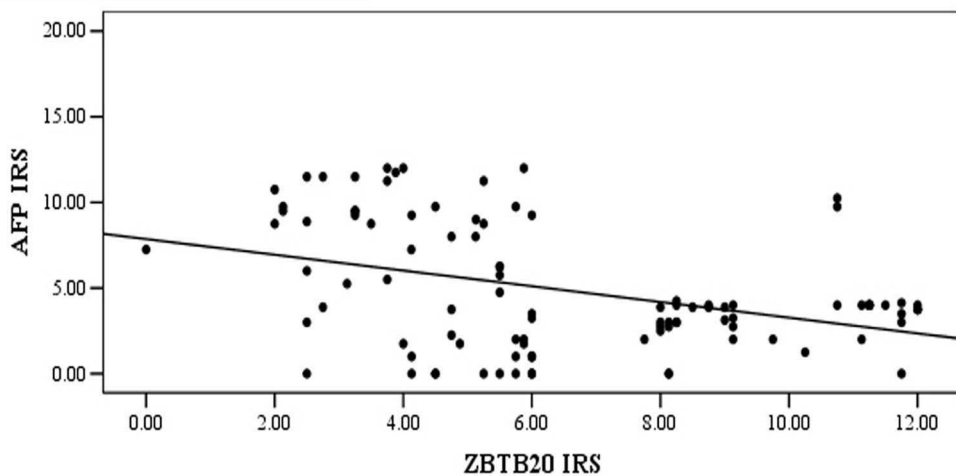

Supplement: MOESM5 [file 9461904]
